# Supplementary material for: The role of solvent cohesion in nonpolar solvation
Source: Royal Society of Chemistry journal article supplement (doi:10.1039/c3sc50740h), 2013-01-01
Supplement: c3sc50740h.pdf [file c3sc50740h.pdf]

## SUPPORTING INFORMATION

# The Role of Solvent Cohesion in Nonpolar Solvation

*Sijbren Otto*

University of Groningen, Centre for Systems Chemistry, Stratingh Institute, Nijenborgh 4, 9747 AG Groningen, The Netherlands.

**Figure S1.** Determination of  $P_i$  for hexadecane by extrapolation from the data<sup>S1</sup> for other linear alkanes.

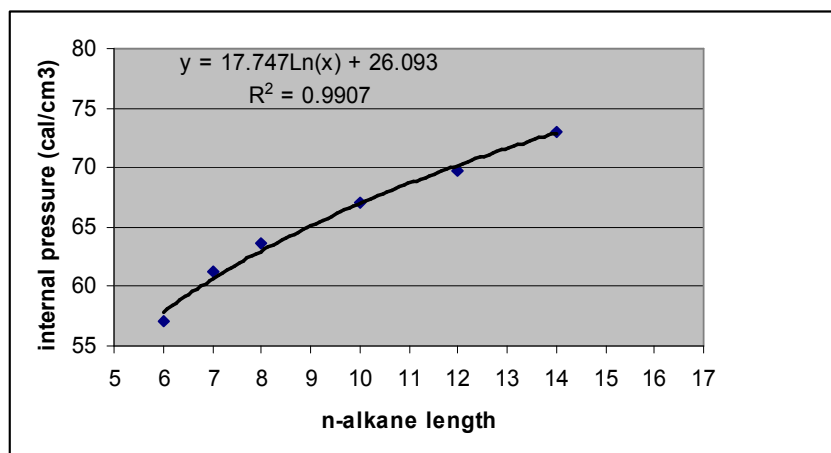

**Table S1.** Correlation coefficients ( $R^2$ ) for plots of the Gibbs energy of transfer of a series of nonpolar solutes from the gas phase to a range of solvents versus solvent cohesion expressed as a linear combination of  $P_i$  and  $ced$  for different values of  $%ced$ . The last line shows the  $%ced$  for which the best correlation is obtained.

| $%ced$                 | He    | Ne    | Ar    | Kr    | Xe    | Rn    | H2    | Me    | Et    | Pr    | Bu    | Pen   | Hex   | Hep   | Oct   |
|------------------------|-------|-------|-------|-------|-------|-------|-------|-------|-------|-------|-------|-------|-------|-------|-------|
| 10                     | 0.576 | 0.581 | 0.639 | 0.485 | 0.345 | 0.346 | 0.672 | 0.467 | 0.361 | 0.281 | 0.257 | 0.197 | 0.264 | 0.276 | 0.186 |
| 20                     | 0.672 | 0.734 | 0.87  | 0.905 | 0.845 | 0.877 | 0.844 | 0.799 | 0.743 | 0.688 | 0.672 | 0.653 | 0.667 | 0.682 | 0.624 |
| 30                     | 0.573 | 0.649 | 0.835 | 0.926 | 0.94  | 0.845 | 0.774 | 0.895 | 0.89  | 0.884 | 0.874 | 0.875 | 0.873 | 0.88  | 0.852 |
| 40                     | 0.501 | 0.578 | 0.762 | 0.892 | 0.943 | 0.959 | 0.689 | 0.89  | 0.922 | 0.945 | 0.939 | 0.948 | 0.942 | 0.943 | 0.934 |
| 50                     | 0.454 | 0.531 | 0.701 | 0.861 | 0.93  | 0.962 | 0.642 | 0.861 | 0.918 | 0.956 | 0.953 | 0.968 | 0.959 | 0.958 | 0.96  |
| 60                     | 0.422 | 0.499 | 0.656 | 0.835 | 0.918 | 0.962 | 0.578 | 0.831 | 0.905 | 0.951 | 0.951 | 0.971 | 0.957 | 0.955 | 0.966 |
| 70                     | 0.4   | 0.476 | 0.621 | 0.815 | 0.907 | 0.961 | 0.544 | 0.804 | 0.89  | 0.942 | 0.944 | 0.968 | 0.949 | 0.947 | 0.965 |
| 80                     | 0.383 | 0.458 | 0.595 | 0.8   | 0.898 | 0.961 | 0.518 | 0.781 | 0.877 | 0.931 | 0.935 | 0.962 | 0.94  | 0.938 | 0.961 |
| 90                     | 0.371 | 0.445 | 0.574 | 0.788 | 0.89  | 0.96  | 0.498 | 0.762 | 0.854 | 0.921 | 0.927 | 0.957 | 0.931 | 0.929 | 0.957 |
| best fit<br>( $%ced$ ) | 16.3  | 17.5  | 22    | 26    | 35    | 55    | 19    | 33    | 45    | 50    | 53    | 58    | 53    | 52    | 63    |

It appears that the  $%ced$  for the best fit seems to level off for the linear alkanes. This is most likely a result of the  $%ced$  approaching the limit for solvation of a methylene unit. It is also noteworthy that for these solutes the correlation coefficients show only minor changes in the range of 50-100  $%ced$ . This is at least to some extent an artefact of the isolated position of water which allows it to exert a dominant influence on the linear regression analysis. Repeating the fitting procedure excluding the data for water gave clearer defined maxima in the relation between correlation coefficient and  $%ced$ . The position of the maxima is not significantly affected by excluding water.

**Figure S2.** Gibbs energies of transfer of the noble gases, hydrogen and linear alkanes from the gas phase to different solvents at 298 K as a function of solvent cohesion, as quantified a linear combination of the internal pressure ( $P_i$ ) and the cohesive energy density ( $ced$ ) (in  $\text{cal}/\text{cm}^3$ ). Standard states: solute(ideal gas, 1M)  $\rightarrow$  solute(ideal solution, 1M). The solvents include: n-hexadecane, n-decane, n-hexane, cyclohexane, carbontetrachloride, diethylether, toluene, benzene, ethyl acetate, methyl acetate, butanone, acetone, DMF, acetonitrile, propylene carbonate, DMSO, isobutyl alcohol, 1-butanol, 2-propanol, 1-propanol, ethanol, methanol, ethylene glycol and water. Data points for water are circled. The insets in the graphs of the smaller solutes show the corresponding correlations with  $ced$  only.

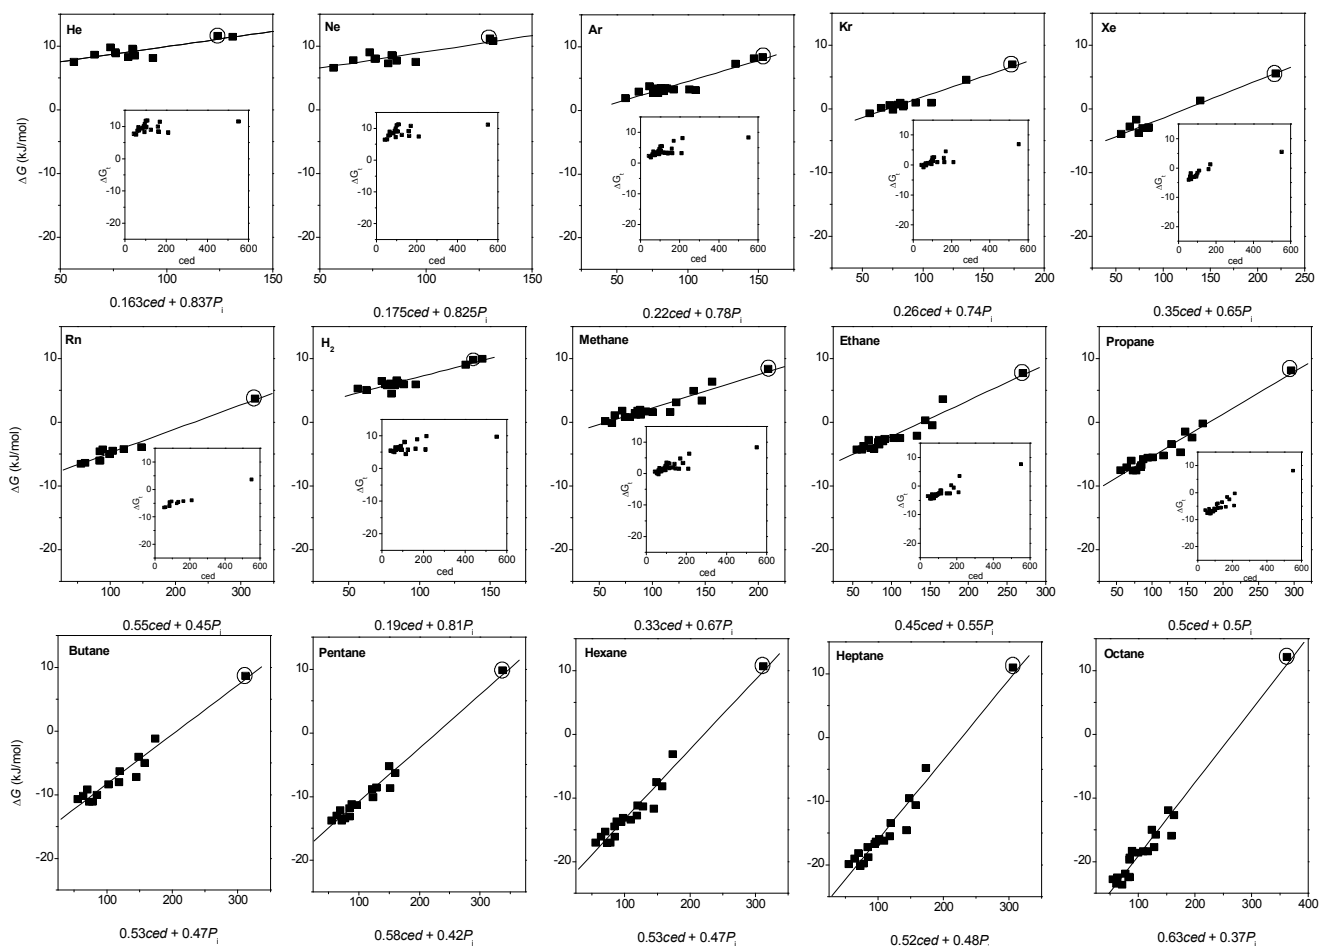

**Figure S3.** Re-analysis of the data in Figure 2 (main text) in which the data for water has been left out of the linear regression.

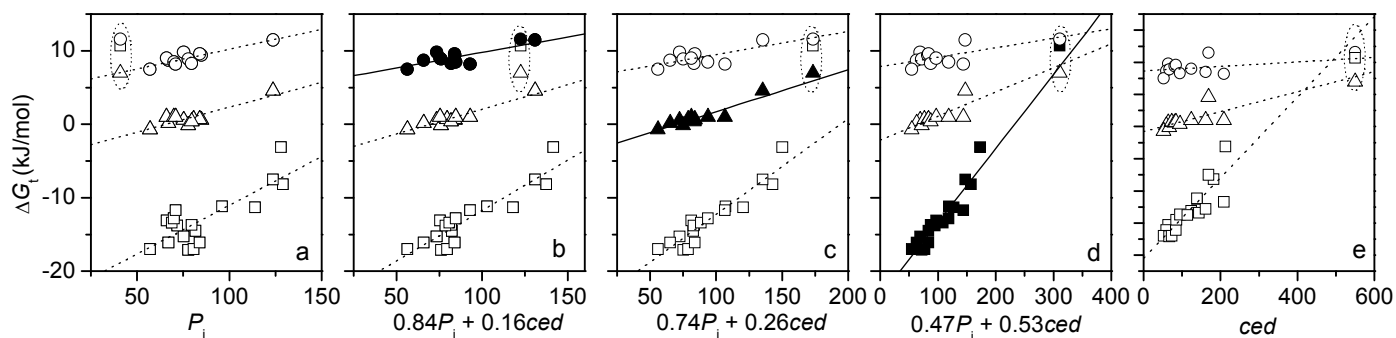

**Figure S4.** Re-analysis of the data in Figure 4 (main text) in which the data for water has been left out of the linear regression.

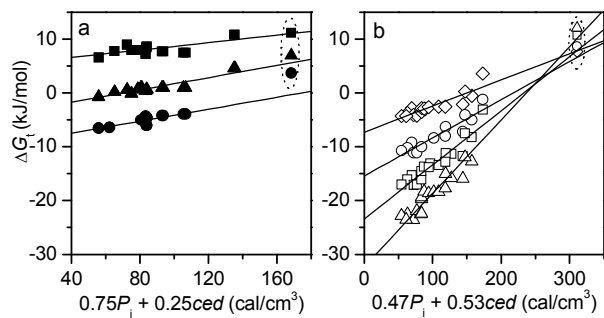

**References:**

S1: Allen, G.; Gee, G.; Wilson, G. J. *Polymer* **1960**, *1*, 456-466.
